# Supplementary material for: Asymmetric fabrication and in vivo evaluation of the wound healing potency of electrospun biomimetic nanofibrous scaffolds based on collagen crosslinked modified-chitosan and graphene oxide quantum dot nanocomposites
Source: Royal Society of Chemistry journal article supplement (doi:10.1039/d3tb00619k), 2023-01-01
Supplement: d3tb00619k1.pdf [file d3tb00619k1.pdf]

1 **Supporting Information**

2

3 **Asymmetric fabrication and in-vivo evaluation of wound healing potency**  
4 **of electrospun biomimetic nanofibrous scaffold based on collagen**  
5 **crosslinked modified-chitosan and graphene oxide quantum dot**  
6 **nanocomposites.**

7

8 Koushik Dutta <sup>a</sup>, Kunal Sarkar <sup>c</sup>, Srikanta Karmakar <sup>a</sup>, Bhuman Gangopadhyay <sup>a</sup>, Arijita Basu <sup>a</sup>,  
9 Sarbashri Bank <sup>c</sup>, Sriparna De <sup>b</sup>, Beauty Das <sup>\*a</sup>, Madhusudan Das <sup>\*c</sup>, Dipankar Chattopadhyay <sup>\*a</sup>

10

11 <sup>a</sup> Department of Polymer Science and Technology, University of Calcutta, 92 A.P.C. Road,  
12 Kolkata 700009, India.

13 e-mail: [dipankar.chattopadhyay@gmail.com](mailto:dipankar.chattopadhyay@gmail.com)

14 <sup>b</sup> Department of Allied Health Sciences, Brainware University, Kolkata-700129, India.

15 <sup>c</sup> Department of Zoology, University of Calcutta, 35, Ballygunge circular road, Kolkata 700019,  
16 India

17

18

19

20

21

22

23

## 24 **1. EXPERIMENTAL SECTION**

### 25 **1.1. Materials**

26 Potassium permanganate (KMnO<sub>4</sub>, ACS grade), sulphuric acid (98% H<sub>2</sub>SO<sub>4</sub>, GR grade),  
27 sodium nitrate (NaNO<sub>2</sub>, extra pure), hydrogen peroxide (30% H<sub>2</sub>O<sub>2</sub>), acetic acid (CH<sub>3</sub>COOH,  
28 glacial 100%), formic acid (HCOOH, 98-100% pure) were purchased from Merck Specialties  
29 Private Ltd., India. Chloroform (CHCl<sub>3</sub>, anhydrous), phosphate buffered saline (PBS), methanol  
30 (CH<sub>3</sub>OH, anhydrous), 2,2,2-trifluoroethanol (TFE), trichloroacetic acid (TCA), thiobarbituric  
31 acid (TBA), nitro blue tetrazolium chloride (NBT) and riboflavin were procured from Sisco  
32 Research Laboratories Pvt. Ltd. (India). Glutaraldehyde (25% in water) and N, N-  
33 dimethylformamide (DMF, anhydrous) were purchased from Spectrochem Pvt. Ltd. (Mumbai,  
34 India). Phthalic anhydride and decanoyl chloride were purchased from TCI Chemical Pvt. Ltd.,  
35 Japan. L929 fibroblast cell was purchased from the National Centre for Cell Science (NCCS,  
36 Pune, India). Chitosan, polycaprolactone (Mn 80000, PCL), nylon syringe filter (0.2 μm pore  
37 size), dialysis tubing (molecular weight cut-off 2000 Da), collagen (type I), 1-ethyl-3-(3-  
38 (dimethylamino)-propyl) carbodiimide (EDC), fluorescein diacetate (FDA) and 2,2-diphenyl-1-  
39 picrylhydrazyl were obtained from Sigma-Aldrich, Germany. Dulbecco's modified eagle  
40 medium (DMEM), fetal bovine serum, MTT reagent, tetramethylethylenediamine (TEMED),  
41 penicillin, and streptomycin were procured from HiMedia, Mumbai, India.

### 42 **1.2. Characterization**

43 Fourier transform infrared (FTIR) spectroscopy was performed using Perkin-Elmer  
44 spectrum Two FT-IR spectrometer over wave number 400-4000 cm<sup>-1</sup>. The surface morphology  
45 and the fiber dimension were elucidated by the scanning electron microscope (ZEISS EVO-  
46 MA10, Germany) and transmission electron microscopy (HRTEM, JEOLJEM 2100) operated at

47 200 kV acceleration voltage. The particle and fiber size distribution were displayed by Image J  
48 (1.51K) software. The X-ray diffraction (XRD) analysis was carried out between  $2\theta = 3$  and  $40^\circ$   
49 by employing an X-PERT-PRO Panalytical diffractometer with  $\text{CuK}\alpha$  (40 kV/30 mA) as the X-  
50 ray source comprising a wavelength of approximately 1.4506 nm. UV-visible spectroscopy was  
51 recorded by a Perkin-Elmer UV-vis Spectrophotometer Lambda 25. X-ray photoelectron  
52 spectroscopy (XPS) study was characterized by a Thermo-VG Scientific ESCA Lab250  
53 microprobe equipped with  $\text{AlK}\alpha$  monochromatic source comprising 1486.6 eV photons  
54 operating at 14 kV and 20 mA.  $^{13}\text{C}$  solid state nuclear magnetic resonance (NMR) spectroscopy  
55 was carried out using AV 500S Bruker 500 MHz instrument.  $^1\text{H}$  solution NMR spectroscopy was  
56 done with the employment of a 400 MHz Bruker instrument. NMR grade trifluoroacetic acid  
57 (5% v/v) incorporated  $\text{D}_2\text{O}$  was taken as a solvent for all the compounds. The mechanical  
58 properties were estimated according to the ASTM method D882-95a with the assistance of the  
59 Zwick Roell (ZO10) instrument. The water contact angle measurements of all the scaffolds were  
60 evaluated using an Apex ACAM-D2 contact angle system.

### 61 **1.3. Porosity measurement**

62 The liquid displacing method was utilized to estimate the porosity of the scaffolds.  
63 Briefly, the scaffold (weighing  $W_i$ ) was immersed in a tube containing absolute ethanol. The  
64 total volume ( $V_1$ ) of the ethanol with the scaffold was recorded. The scaffold was kept immersed  
65 in ethanol until saturation. The ethanol-saturated scaffold was taken out and the remaining  
66 volume ( $V_2$ ) of the ethanol left was noted. The weight ( $W_f$ ) of the ethanol-soaked scaffold was  
67 also recorded. The recorded data were employed in equation 1 to calculate the porosity of the  
68 scaffold. The data sets were calculated thrice experimentally and the average value was taken.

69 Porosity =  $\frac{W_f/\rho - W_i/\rho}{V_1 - V_2}$  ..... (1)  $\rho$  = density of ethanol

70 **1.4. Water vapor transmission rate (WVTR)**

71 The WVTR of the scaffolds was determined by pouring 20 mL of phosphate buffer saline  
 72 (PBS) into a 50 mL centrifuge tube with an open area of S cm<sup>2</sup>. The centrifuge tube was covered  
 73 with a piece of a scaffold, and the total weight was recorded (W<sub>1</sub>). The scaffold covered tube was  
 74 incubated at 37 °C for about 24 hours and subsequently, the total weight was again recorded  
 75 (W<sub>2</sub>). Equation 2 was employed to evaluate the WVTR of the scaffolds in 24 hours. After three  
 76 times of experiments, the average values were taken.

77 WVTR =  $\frac{W_1 - W_2}{S}$  ..... (2)

78 **1.5. Catalase-Like activity**

79 The catalase-like activity assay was estimated by the addition of 10 (M) H<sub>2</sub>O<sub>2</sub> in 100 µg  
 80 mL<sup>-1</sup> scaffolds. After 10 min, the evolution of gas bubbles was seen. The catalase-like activity of  
 81 the scaffolds was also detected by analysing the reduction rate of H<sub>2</sub>O<sub>2</sub> levels. The standard  
 82 initial concentration of H<sub>2</sub>O<sub>2</sub> was 25 mmol L<sup>-1</sup>, and the final concentration of H<sub>2</sub>O<sub>2</sub> after the  
 83 incubation with the scaffold was evaluated spectrophotometrically with regard to the absorbance  
 84 peak of H<sub>2</sub>O<sub>2</sub> at 230 nm.

85 **1.6. Antimicrobial activities assay**

86 The antimicrobial activity of the scaffolds was assessed with the help of the plate  
 87 counting method. Both *Escherichia coli* (*E. coli*) and *Staphylococcus aureus* (*S. aureus*) bacteria

88 were cultured in Luria-Bertani (LB) medium over a period of 16 hours at 37 °C with continuous  
89 shaking, followed by washing with fresh sterile 0.9% saline thrice. The cultures were then  
90 diluted in sterile 0.9% saline solution to  $\sim 10^7$  colony-forming units per milliliter (CFU mL<sup>-1</sup>). To  
91 expose the active surface of the bacteria, all the scaffolds with an area of 2 cm<sup>2</sup> were placed in a  
92 plastic holder. Bacterial suspensions (0.5 mL per cm<sup>2</sup>) were subjected to contact with the  
93 scaffold surface over a period of 60 min at 37 °C temperature. With the discarding of excess  
94 bacterial suspension, the scaffolds were washed thoroughly with sterile 0.9% saline. After  
95 thorough washing, scaffolds were put into a 50 mL tube containing 10 mL of sterile 0.9% saline  
96 and subjected to vortex for 8 min to remove the bacterial cells from the scaffold's surface.  
97 Finally, the collected bacteria cells were put on LB agar plates and incubated for a period of 16  
98 hours at 37 °C.

99 To get the SEM image of bacteria, the bacterial suspensions (*S. aureus*) were exposed to  
100 the surface of the scaffold by the method mentioned above, followed by a thorough washing of  
101 the scaffold with sterile 0.9% saline solution and fixed with Karnovsky's fixative (2.5 wt%  
102 glutaraldehyde in 0.2 M PBS buffer) for 3 hours. The dehydration step of the samples was  
103 carried out by sequential immersion in water/ethanol (30, 50, 60, 70, 80, 90, 100%), and kept in a  
104 desiccator (below 30 °C) for 12 hours to dry. Finally, the samples were sputter-coated with  
105 platinum and were imaged by SEM.

### 106 **1.7. *In vitro* blood coagulation test**

107 According to reported literature<sup>1</sup>, the nanofiber scaffolds and medical gauze (served as a control)  
108 were cut into a circular pattern (approximately 20 mm in diameter). The experimental part was  
109 initiated with the casting of 100  $\mu$ L of blood (comprising 10% sodium citrate by volume) onto  
110 the upper surface of individual samples and subjected to incubation at 37 °C for 5 min. The

111 samples were mildly rinsed in 50 mL of distilled water to separate uncoagulated red blood cells.  
112 Drabkin's reagents (D5941 Sigma-Aldrich) were employed for quantitative estimation of blood  
113 coagulations on each scaffold in compliance with the manufacturer's guidelines of the same. The  
114 absorbance values of individual samples were measured at a wavelength of 540 nm in a UV  
115 spectrophotometer. Other than that, the assessment of blood clotting time was done in  
116 accordance with the previously reported study<sup>1</sup>. The medical gauze and the scaffolds with  
117 coagulated blood was air dried for 4 hours at 37 °C. Then the samples were fixed in 0.25%  
118 glutaraldehyde for 45 minutes. After fixation the samples were subjected to alcohol gradation  
119 (50%, 70%, 90% and 100%) for 10 minutes at each step. Finally, the samples were air dried and  
120 studied by SEM imaging.

## 121 **1.8. Cell culture**

122 Under an atmospheric condition of 5% CO<sub>2</sub> and a temperature of 37 °C, a mouse  
123 fibroblast cell line L929 was cultured in Dulbeccos modified eagle medium (DMEM) with the  
124 subsequent addition of 10 wt% fetal bovine serum and 1wt% antibiotic. Coverslips were coated  
125 by scaffold and stationed onto 24 well cell culture plates. The cells in the culture flask were  
126 disengaged by trypsin-EDTA and subsequently seeded on the scaffold at a density of  $1.5 \times 10^4$   
127 cells per well.

## 128 **1.9. *In vitro* biocompatibility, cell adhesion, and proliferation studies**

129 An MTT assay (3-[4,5-dimethylthiazol-2-yl]-2,5-diphenyl tetrazolium bromide) was  
130 engaged to estimate the biocompatibility of the scaffold at different culture duration up to 72  
131 hours for three times. MTT solution was subsequently added to each well and was subjected to  
132 incubation for 3 hours. The optical density of the formazan complex dissolved in dimethyl  
133 sulfoxide was evaluated with a microplate reader at the wavelength of 570 nm. The percentage of  
134 cell viability was determined by investigating the optical density of the control and samples.

135 The adhesion and proliferation of L929 fibroblast cells were assessed at regular time  
136 intervals (day 1, 3, and 5) through fluorescein diacetate staining. First, the scaffolds with cells  
137 were removed from the culture medium and washed with PBS. The cells, after thorough  
138 washing, were incubated with FDA solution (10 µg/mL) for 30 min and again washed with PBS.  
139 Finally, the obtained cells were viewed with a Leica fluorescence microscope.

140 For SEM analysis, the scaffolds with cells were removed from the culture medium and  
141 washed with PBS, followed by incubation with 4% paraformaldehyde for 30 min. The scaffolds  
142 were dehydrated in a graded series of ethanol solutions and dried overnight. The dehydrated  
143 scaffolds were examined under SEM at 5 kV accelerating voltage.

#### 144 **1.10. *In vivo* wound healing experiments**

145 For excisional wound healing investigation, healthy male Wistar rats of weight 200–230  
146 g were chosen. All the experimental procedures were done before the approval of the  
147 Institutional Animal Ethical Committee (Department of Zoology, University of Calcutta, India,  
148 885/GO/RE/S/05/CPCSEA). An intraperitoneal administration of ketamine (35 mg/kg) and  
149 xylazine (5 mg/kg) was done to anesthetize individual animals. A complete thickness excision  
150 wound was made by excising the dorsal skin of rats after shaving the dorsal surface and  
151 disinfecting it with 70% ethanol. 18 Wister rats were subdivided into three groups (six rats per  
152 group). Group 1 (control) rats were tended with gauze, while group 2 and 3 were tended with  
153 scaffold 1 and 3 respectively. In order to keep the healing material on the incised area, scaffolds  
154 were additionally enveloped with gauze and fixed with a bandage. Photographs of wounds were  
155 taken on days 3,7 and 10 after the wound incision. Wound size was traced with the equipment of  
156 a transparent sheet, followed by a new dressing. The wound closure percentage was determined  
157 by the following formula.

$$C_n = \frac{(S_0 - S_n)}{S_0} \times 100 \dots\dots\dots (3)$$

158

159 Where  $C_n$  is the percentage of wound size reduction on days 3, 7, and 10 post-wounding,  $S_0$  is  
160 the initial wound area, and  $S_n$  is the wound area on days 3, 7, and 10 post-wounding.

161 **1.11. Histological analysis**

162 On day 3, 7, and 12 after surgery, a full-thickness skin biopsy was taken from the center  
163 of wounds with surrounding tissues. Tissue samples were fixed in 10% formalin for histological  
164 analysis of tissue samples, and these were embedded in paraffin wax after dehydration using a  
165 series of graded alcohol. The tissues were sectioned at 5  $\mu\text{m}$  for hematoxylin and eosin (H&E)  
166 and Masson–Goldner trichrome (MGT) staining.

167 **1.12. Biochemical Assays**

168 Malondialdehyde (MDA) levels in the tissue were determined by mixing 0.5 mL of  
169 homogenate with 2.5 mL of trichloroacetic acid (20%) and 1.0 mL of thiobarbituric acid (0.6%).  
170 The mixture was heated for 30 min in a boiling water bath, cooled, and centrifuged at 3000 g for  
171 10 min. The absorbance was measured at 535 nm<sup>2</sup>.

172 Superoxide dismutase activity was determined by method according to literature<sup>3</sup>. The  
173 reaction mixture composed of 80 mM Tris (pH 8.9), 0.12 mM EDTA, 10.8 mM TEMED,  
174 0.003% BSA, 30  $\mu\text{M}$  riboflavin in 5 mM KOH, 300  $\mu\text{M}$  NBT (SRL, 11207), 50  $\mu\text{L}$  supernatant  
175 was added. It was kept under light (150 W) for 2 min, and the absorbance was taken at 560 nm.  
176 A blank without enzyme and light showed NBT present in the reaction mixture. Unit SOD was  
177 calculated as U/mg protein.



178           The rate of decomposition of hydrogen peroxide (H<sub>2</sub>O<sub>2</sub>) at 240 nm absorbance over 1 min  
179 was used to assess catalase activity in the wound tissue biopsy samples according to the  
180 literature<sup>4</sup>. Catalase activity was expressed as U/g protein.

181

182

### 183           **1.13. ELISA**

184           Proteins were isolated from wound tissue biopsy samples in RIPA buffer. Then levels of  
185 inflammatory cytokines IL-6, TNF- $\alpha$ , and IL-1 $\beta$  were measured by using ELISA using a  
186 commercial kit from Sigma.

### 187           **2.20. Statistical Analysis**

188           Each and every experimental sets were conducted thrice with data written in the form of average  
189  $\pm$  standard deviation. Statistical analysis was executed by one-way ANOVA with Tukey's post  
190 hoc test by employing Origin Pro 8.0. P values < 0.05 were assessed to be statistically  
191 noteworthy.

### 192           **Supplementary Figures**

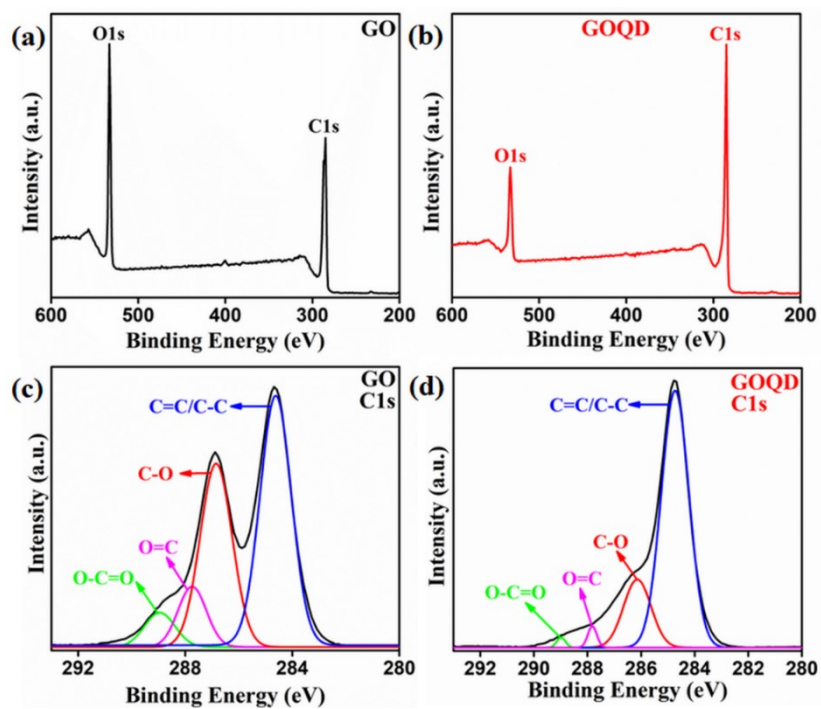

193

194 **Figure S1.** XPS survey spectra of GO (a) and GOQD (b). High-resolution C1s peaks of GO (c)

195 and GOQD (d).

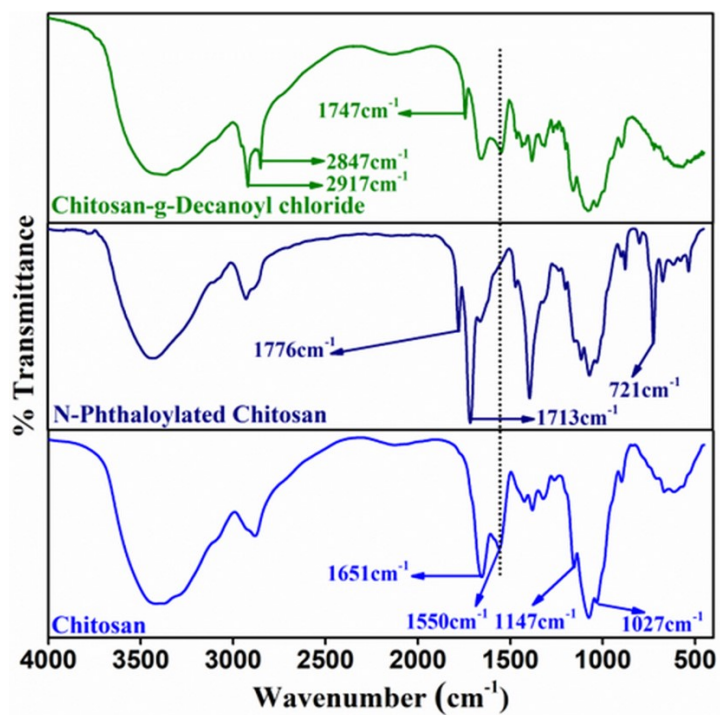

196

197

**Figure S2.** FTIR spectroscopy of chitosan, N-phthaloylated chitosan, and CS-g-Dc.

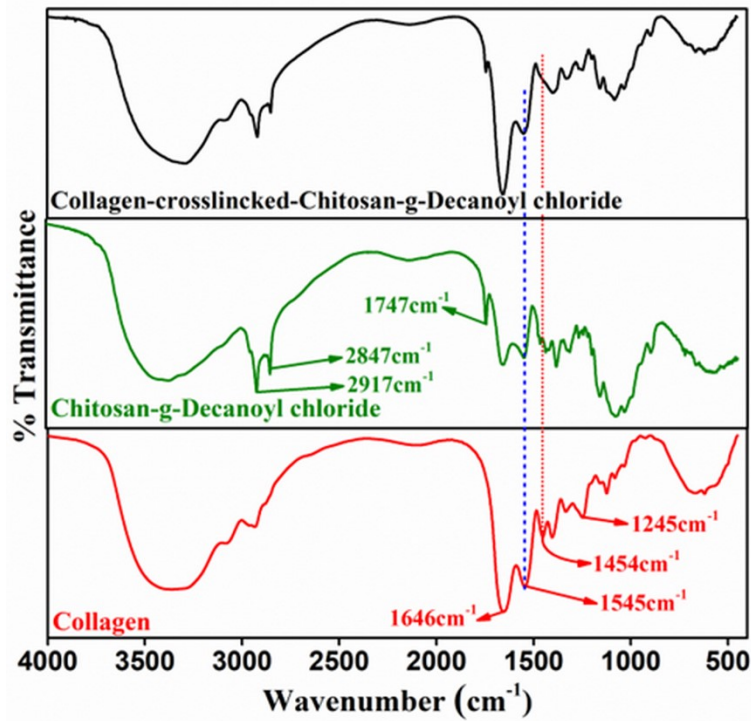

198

199

**Figure S3.** FTIR spectroscopy of collagen, CS-g-Dc, and CG-cross-CS-g-Dc.

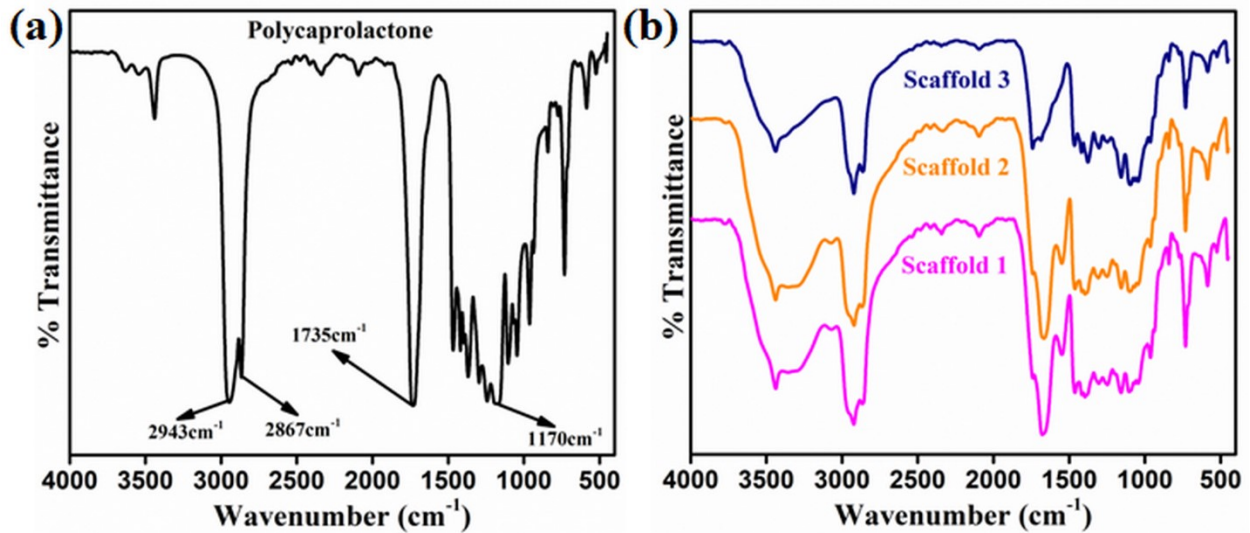

200

201

**Figure S4.** FTIR spectroscopy of polycaprolactone (a) and scaffold 1, 2, and 3 (b).

202

203 **REFERENCES**

- 204 1. Zhang, S.; Wang, H., Current progress in 3D bioprinting of tissue analogs. *SLAS*  
205 *TECHNOLOGY: Translating Life Sciences Innovation* 2019, *24* (1), 70-78.
- 206 2. Yoshioka, T., Lipid peroxidation in maternal and cord blood and protective mechanisms.  
207 *Am J Obstet Gynecol* 1979, *135*, 972-976.
- 208 3. Jadav, R., Enhancing Rice Yield Using iron-pulsing. INDIAN ACAD SCIENCES CV RAMAN  
209 AVENUE, SADASHIVANAGAR, PB# 8005, BANGALORE ...: 2021.
- 210 4. Lopez-Torres, M.; Thiele, J.; Shindo, Y.; Han, D.; Packer, L., Topical application of  
211  $\alpha$ -tocopherol modulates the antioxidant network and diminishes ultraviolet-induced oxidative  
212 damage in murine skin. *British Journal of Dermatology* 1998, *138* (2), 207-215.

213

214
